# Supplementary material
Source: Springer Nature journal article supplement (https://www.springermedizin.de/resource/supplementary/12875_2012_862_MOESM1_ESM.pdf/9435688)
Supplement: MOESM1 [file 9435688]

Assessed for eligibility: **143 clusters**

not eligible/refuse participation: **98 clusters**  
**28** clusters did not meet inclusion criteria  
**70** clusters refused to participate

Stratified: **45 clusters**  
(94 OTs / 80 MDs / 48 managers)

30 nursing homes

13 hospitals

2 mental health services

Randomized (45 clusters)

**Control group (28 clusters: 8 hospitals, 19 nursing homes, 1 mental health service)**

Average cluster = 2,07 OTs (range 1-3), 1,54 MD (range 1-6), 1 manager (range 0-2)

**Total No of participants:**

58 OTs / 44 MDs / 28 managers

**Experimental group (17 clusters: 5 hospitals, 11 nursing homes, 1 mental health service)**

Average cluster size = 2,12 OTs (range 1-3), 2,18 MD (range 1-6), 1,18 manager (range 0-4)

**Total No of participants:**

36 OTs / 36 MDs / 20 managers

**Lost to follow up (6 months)**

1 OT: job change

**Professionals added:**

1 MD: late response to participate in the study

**New cluster demographics:**

28 clusters, 57 OTs (range1-3), 44 MDs (range 1-6), 28 managers (range 0-2)

**Lost to follow up (6 months)**

2 OTs; job change (1), management decision(1)

4 MDs; job role modification (2), high workload (2)

2 manager; job change (2)

**Professionals added:**

2 MDs; replacement for MDs lost

1 manager; replacement for manager lost

**New cluster demographics:**

17 clusters, 34 OTs (range1-3), 34MD (range1-6), 19 manager (0-4)

**Lost to follow up (12 months)**

1 cluster; drop-out of OTs and MD

3 OTs; high workload (2), job change (1)

4 MD; difficulty including patients (1); high work load (1); job role modification (1); unknown (1)

**Added professionals:**

1 MD: job role modification of previous participant

**New cluster demographics:**

27 clusters, 54 OTs (range 1-3), 41 MDs (range 1-6), 28 managers (range 0-2)

**Lost to follow up (12 months)**

0 clusters 1 OT; illness

2 MDs; job role modification (1); high work load (1)

2 managers; job change (2)

**Added professionals:**

1 MD; replacement for MD lost to follow-up

2 managers; replacement for managers lost to follow-up (2)

**New cluster demographics:**

17 clusters, 33 OTs (range 1-3), 33 MDs (range 1-6), 19 manager (0-4)

**Analyzed – intention to treat**

28 clusters

**Analyzed – intention to treat**

17 clusters
